# Supplementary material
Source: PubMed Central journal article supplement (PMC2697269)
Supplement: NIHMS103858-supplement-supplement_1.pdf [file NIHMS103858-supplement-supplement_1.pdf]

**Supplementary Table 1. Association of MnSOD Val16Ala and patient characteristics with race/ethnicity**

|                                | <b>Norwegian Patients<br/>(n=329)</b> | <b>European-Americans<br/>(n=105)</b> | <b>African-Americans<br/>(n=139)</b> | <b>P-value<sup>†</sup></b> |
|--------------------------------|---------------------------------------|---------------------------------------|--------------------------------------|----------------------------|
| <b>Val16Ala Genotype</b>       |                                       |                                       |                                      |                            |
| Val/Val                        | 75 (23%)                              | 30 (28%)                              | 46 (33%)                             | 0.155                      |
| Val/Ala                        | 174 (53%)                             | 52 (50%)                              | 69 (50%)                             |                            |
| Ala/Ala                        | 80 (24%)                              | 23 (22%)                              | 24 (17%)                             |                            |
| <b>Patient Characteristic*</b> |                                       |                                       |                                      |                            |
| Age at diagnosis (Mean ± S.D.) | 62.5 ± 13.8                           | 55.9 ± 13.2                           | 54.3 ± 14.2                          | 0.735 <sup>1</sup>         |
| Tumor Size                     |                                       |                                       |                                      |                            |
| T1                             | 90 (28%)                              | 25 (29%)                              | 28 (25%)                             | 0.001 <sup>2</sup>         |
| T2                             | 95 (30%)                              | 42 (49%)                              | 51 (46%)                             |                            |
| T3                             | 78 (24%)                              | 15 (17%)                              | 26 (23%)                             |                            |
| T4                             | 56 (18%)                              | 4 (5%)                                | 6 (5%)                               |                            |
| Node Involvement               |                                       |                                       |                                      |                            |
| No                             | 136 (45%)                             | 63 (64%)                              | 46 (61%)                             | <0.001 <sup>3</sup>        |
| Yes                            | 167(55%)                              | 35 (36%)                              | 69 (39%)                             |                            |
| Grade                          |                                       |                                       |                                      |                            |
| 1                              | 41 (13%)                              | 17 (20%)                              | 16 (13%)                             | <0.001 <sup>4</sup>        |
| 2                              | 177 (56%)                             | 37 (43%)                              | 37 (30%)                             |                            |
| 3                              | 100 (31%)                             | 32 (37%)                              | 72 (57%)                             |                            |
| Estrogen Receptor Status       |                                       |                                       |                                      |                            |
| Negative                       | 96 (31%)                              | 34 (33%)                              | 66 (47%)                             | 0.002 <sup>5</sup>         |
| Positive                       | 216 (69%)                             | 70 (67%)                              | 53 (53%)                             |                            |
| TP53 Mutation Status           |                                       |                                       |                                      |                            |
| Negative                       | 226 (70%)                             | 90 (86%)                              | 108 (77%)                            | 0.003 <sup>6</sup>         |
| Positive                       | 98 (30%)                              | 15 (14%)                              | 31 (22%)                             |                            |
| Adjuvant Chemotherapy          |                                       |                                       |                                      |                            |
| No                             | 123 (39%)                             | 46 (49%)                              | 52 (40%)                             | 0.201                      |
| Yes                            | 194 (61%)                             | 48 (51%)                              | 80 (60%)                             |                            |

\* Cases with missing information are not included

<sup>†</sup> Chi-square test and One-Way Anova (age at diagnosis) were used to compare differences in patient characteristics.

<sup>1</sup> One-way ANOVA with Bonferroni's correction for multiple comparisons found a significant difference in age at diagnosis between Norwegians and European-Americans ( $P < 0.001$ ) and Norwegians and African-Americans ( $P < 0.001$ ), but not between European-Americans and African-Americans ( $P = 1.0$ )

<sup>2</sup> Individual Chi-square tests found a significant difference in tumor size between Norwegians and European-Americans ( $P < 0.001$ ), Norwegians and African-Americans ( $P = 0.002$ ), but not between European-Americans and African-Americans ( $P = 0.744$ )

<sup>3</sup> Individual Chi-square tests found a significant difference in nodal involvement between Norwegians and European-Americans ( $P < 0.001$ ), Norwegians and African-Americans ( $P = 0.002$ ), but not between European-Americans and African-Americans ( $P = 0.607$ )

<sup>4</sup> Individual Chi-square tests found a significant difference in tumor grade between Norwegians and African-Americans ( $P < 0.001$ ), European-Americans and African-Americans ( $P = 0.014$ ), but not Norwegians and European-Americans ( $P = 0.084$ )

<sup>5</sup> Individual Chi-square tests found a significant difference in estrogen receptor status between Norwegians and African-Americans ( $P = 0.001$ ), European-Americans and African-Americans ( $P = 0.02$ ), but not Norwegians and European-Americans ( $P = 0.71$ )

<sup>6</sup> Individual Chi-square tests found a significant difference in TP53 mutation status between Norwegians and European-Americans ( $P = 0.001$ ), but not European-Americans and African-Americans ( $P = 0.113$ ), nor Norwegians and African-Americans ( $P = 0.08$ )

**Supplementary Table 2. Race/ethnicity and breast cancer-specific survival**

|                          | Univariate       |         | Multivariate*    |         |
|--------------------------|------------------|---------|------------------|---------|
|                          | HR (95% CI)      | P-value | HR (95% CI)      | P-value |
| <b>5-year survival</b>   |                  |         |                  |         |
| African-American (n=139) | 1 (ref.)         |         | 1                |         |
| European descent (n=434) | 0.77 (0.55–1.02) | 0.152   | 0.65 (0.42–1.01) | 0.051   |
| <b>10-year survival</b>  |                  |         |                  |         |
| African-American (n=139) | 1                |         | 1                |         |
| European descent (n=434) | 0.82 (0.59–1.13) | 0.232   | 0.75 (0.50–1.10) | 0.139   |

Cox Proportional-Hazards regression with adjustments for age at diagnosis, study site, tumor size, tumor grade, nodal involvement, and estrogen receptor and p53 mutational status

**Supplementary Table 3. Effect of tamoxifen treatment\* on the association of Val16Ala with 10-year breast cancer-specific survival in ER-positive patients**

|                                            | Univariate                |         | Multivariate <sup>†</sup> |         |
|--------------------------------------------|---------------------------|---------|---------------------------|---------|
|                                            | HR (95% CI)               | P-value | HR (95% CI)               | P-value |
| <b>Norway ER-positive (with Tamoxifen)</b> | <b>(n=216)</b>            |         | <b>(n=198)</b>            |         |
| Val/Val                                    | 1 (ref.)                  |         | 1 (ref.)                  |         |
| Val/Ala                                    | 1.09 (0.57-2.11)          | 0.774   | 0.95 (0.47-1.91)          | 0.881   |
| Ala/Ala                                    | 2.11 (1.08-4.13)          | 0.028   | 2.45 (1.18-5.06)          | 0.016   |
| Val/Ala & Ala/Ala                          | 1.42 (0.77-2.58)          | 0.260   | 1.33 (0.70-2.53)          | 0.383   |
|                                            | <i>P</i> <sub>trend</sub> | 0.014   |                           |         |
| Val/Val & Val/Ala                          | 1 (ref.)                  |         | 1 (ref.)                  |         |
| Ala/Ala                                    | 1.99 (1.22-3.25)          | 0.005   | 2.26 (1.36-3.77)          | 0.002   |
| <b>US ER-positive (no Tamoxifen)</b>       | <b>(n=64)</b>             |         | <b>(n=43)</b>             |         |
| Val/Val                                    | 1 (ref.)                  |         | 1 (ref.)                  |         |
| Val/Ala                                    | 1.48 (0.54-4.09)          | 0.441   | 0.94 (0.19-4.52)          | 0.936   |
| Ala/Ala                                    | 0.80 (0.21-3.01)          | 0.747   | n/a                       |         |
| Val/Ala & Ala/Ala                          | 1.25 (0.47-3.38)          | 0.647   | 1.01 (0.22-4.55)          | 0.989   |
|                                            | <i>P</i> <sub>trend</sub> | 0.754   |                           |         |
| Val/Val & Val/Ala                          | 1 (ref.)                  |         | 1 (ref.)                  |         |
| Ala/Ala                                    | 0.59 (0.20-1.73)          | 0.338   | 2.61 (0.37-18.6)          | 0.338   |
| <b>US ER-positive (with Tamoxifen)</b>     | <b>(n=68)</b>             |         | <b>(n=58)</b>             |         |
| Val/Val                                    | 1 (ref.)                  |         | 1 (ref.)                  |         |
| Val/Ala                                    | 1.91 (0.46-8.02)          | 0.374   | n/a                       |         |
| Ala/Ala                                    | 4.13 (0.92-18.5)          | 0.064   | 35.0 (0.3-3768)           | 0.137   |
| Val/Ala & Ala/Ala                          | 2.53 (0.68-9.37)          | 0.163   | 3.40 (0.64-17.9)          | 0.149   |
|                                            | <i>P</i> <sub>trend</sub> | 0.057   |                           |         |
| Val/Val & Val/Ala                          | 1 (ref.)                  |         | 1 (ref.)                  |         |
| Ala/Ala                                    | 2.86 (0.86-9.52)          | 0.087   | 4.51 (0.71-28.4)          | 0.109   |

\* Information on tamoxifen treatment was abstracted from medical records. All ER-positive patients in Norway received tamoxifen

<sup>†</sup> Cox Proportional-Hazards regression with adjustments for age at diagnosis, study site, race, tumor size, tumor grade, nodal involvement, and p53 mutation. n/a = could not computed

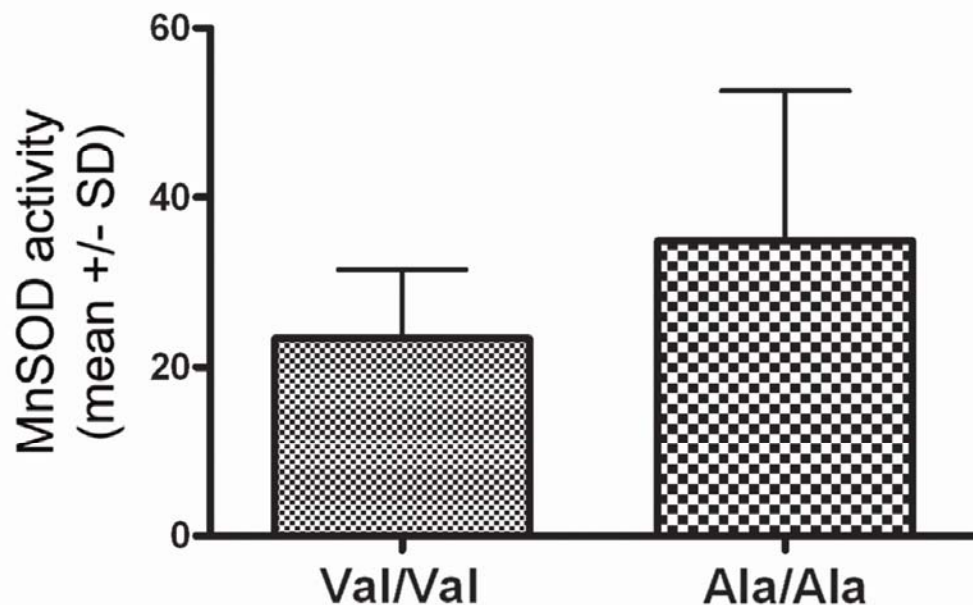

Figure S1: MnSOD activity in human lymphoblast cells by Val16Ala genotype. Shown is the mean MnSOD activity  $\pm$  SD for lymphoblast cell lines with the Val/Val (n=5) and Ala/Ala (n=5) *SOD2* genotypes. Lymphoblast cells with the Ala/Ala genotype have an average 49% increase in MnSOD activity compared with cells that have the Val/Val genotype ( $P = 0.052$ ).
